# Supplementary material
Source: PubMed Central journal article supplement (PMC8608969)

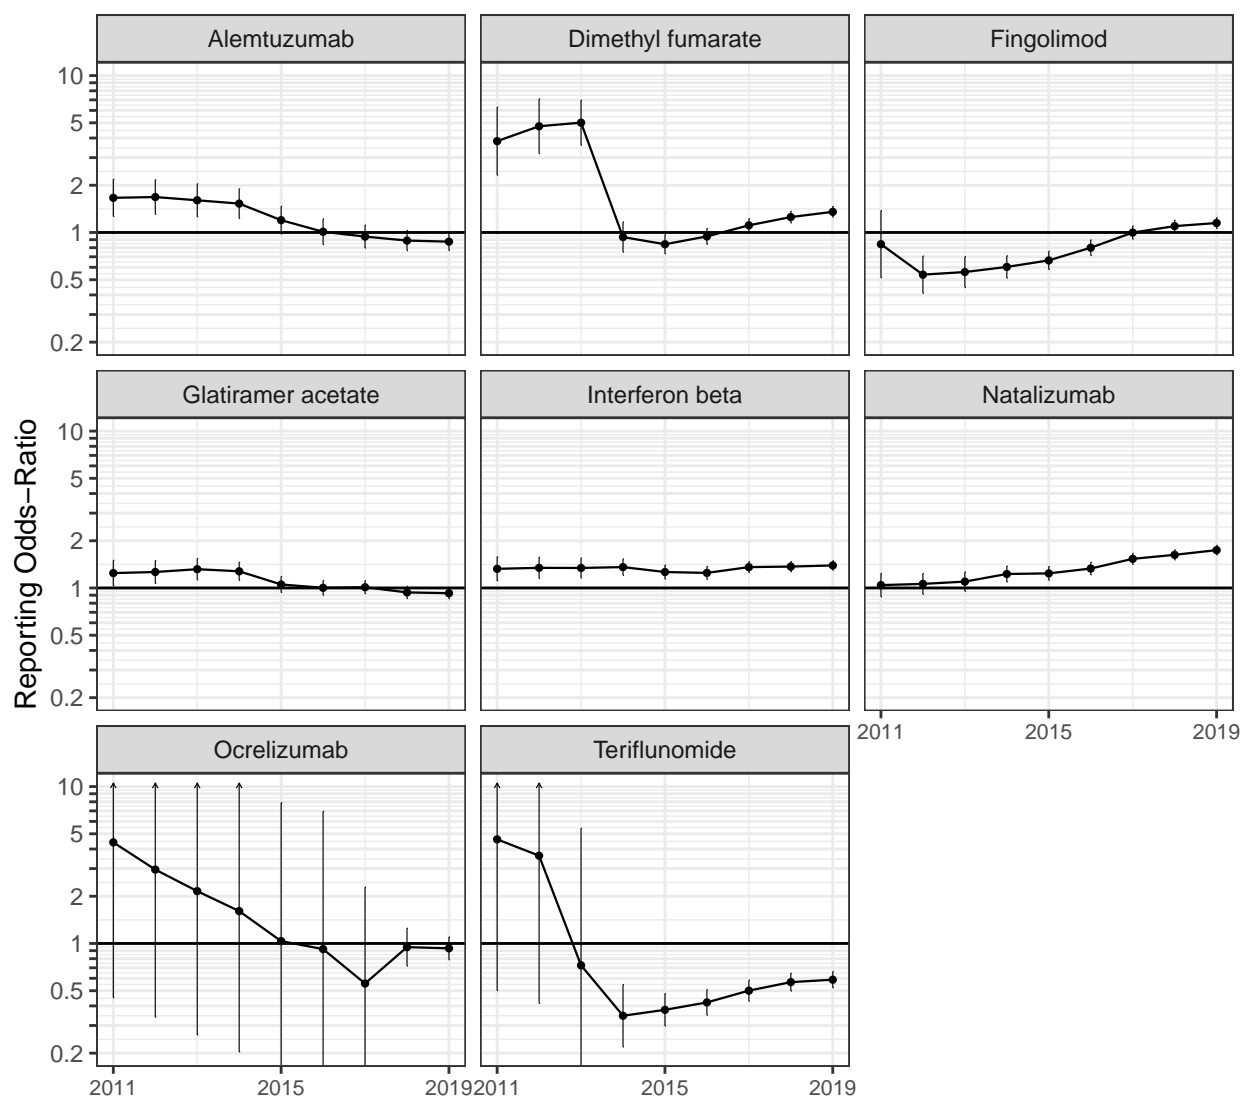

Supplement: 13311_2021_1073_MOESM8_ESM.pdf [file 13311_2021_1073_MOESM8_ESM.pdf]
